# Supplementary material for: The design of second-order nonlinear optical chromophores exhibiting blue-shifted absorption and large nonlinearities: the role of the combined conjugation bridge
Source: Royal Society of Chemistry journal article supplement (doi:10.1039/b007653h), 2001-01-01
Supplement: b007653h.doc [file b007653h.doc]

# Electronic Supplementary Information manuscript no. b007653H

“The design of second-order nonlinear optical chromophores

exhibiting blue-shifted absorption and large optical nonlinearities:

The role of the combined conjugation bridge”

Jingdong Luo, Jianli Hua, Jingui Qin, Jiqi Cheng, Yaochun Shen, Zuhong Lu,

Peng Wang, Cheng Ye

The chromophores **I** and **II** are synthesized by means of two consecutive Knoevenagel condensations (Scheme 1). Compound **4b** was obtained as a mixture of cis and trans isomers with a ratio of 5:1, and it was used in the last step without further separation. The condensation of Compound **3** with **4a** and **4b** gave the corresponding chromophores **I** and **II**, respectively, and the linkage of the carbon-carbon double bond built in this step is confirmed to be trans by detailed 1H-NMR analysis. Chromophores **7** and **10** were prepared in this work by the Knoevenagel condensation of Compound **3** with malononitrile and 3-phenyl-5-isoxazolone, respectively.

# Scheme 1 Synthetic route for Chromophores I and II

# Experimental

All solvents and reagents were used as received without further purification except those mentioned. Following instrumentation were utilized for spectroscopic measurement: 1H-NMR, Varian Mercury 300; IR, Schimadzu FTIR 8000 series; UV-Vis, SCHIMADZU 1206. Elemental analysis were performed by CARLOERBA-1106 micro-elemental analyzer.

Procedure for preparation of 3-phenyl-4-(3,5,5-trimethyl-2-hexene-1-ylidene)-2-isoxazol-5-one, Compound **4b**):

Isophorone (4.5 mL, 30 mmol), ammonium acetate (2g, 26 mmol), and 3-phenyl-5-isoxazolone(4.0 g, 25 mmol) were dissolved in the solution of DMF (25 mL) and acetic anhydride (1 mL). The reaction mixture was allowed to stir at 80 C for 30 h, and then the cooled solution was poured into 100 mL of water. The resulting precipitate with deep color was washed by water, followed by drying in *vacuum* overnight. Recrystallization of the crude product twice afforded compound **4b** as a red crystal (1.6 g, 23 %). m.p. 156-7 C. 1H-NMR (CDCl3):  7.95 (t, J = 1.4 Hz, 1H), 7.25-7.50 (m, 5H), 2.09 (s, 2H), 2.04 (s, 2H), 1.99 (s, 3H), 1.00 (s, 1H), 0.75 (s, 5H). UV-Vis (max): 242 nm, 335 nm. MS (FAB), m/z: 281, 100%.

Procedure for preparation of Chromophore **I**:

A solution of DMF (5 mL) containing Compound **3** (0.63 g, 2 mmol), **4a** (0.38 g, 2 mmol), and piperidine (0.03 mL) was stirred at 90 C for 5 h. Then the solution was poured into 200 mL of water, and the resulting precipitation was collected by filtration and washed with large amount of water. The crude product was purified by column chromatography using petroleum ether/ethyl acetate as the eluent, and then recrystallized from acetone to afford Chromophore **I** as a black powder (0.7 g, 70%). m.p. 190-191 C. 1H-NMR (CDCl3):  1.06 (s, 6H), 2.42 (s, 2H), 2.52 (s, 2H), 2.60-3.00 (br, 2H), 3.60-4.00 (m, 8H), 6.60-6.80 (d, J = 10 Hz, 3H), 6.94 (s, 2H), 7.40-7.60 (d, J = 10 Hz, 2H), 7.70-7.90 (d, J = 10 Hz, 4H). IR: 2219 cm-1 (CN). MS (FAB), m/z: 482 [M+1], 100 %. Calculated for C29H31N5O2: C, 72.32; H, 6.49; N, 14.54. Found: C, 72.25; H, 6.67; N, 14.42.

Procedure for preparation of Chromophore **II**:

A solution of absolute ethanol (3 mL) containing Compound **3** (0.62 g, 2 mmol), **4b** (0.28 g, 1 mmol), and piperidine (0.2 mL) was refluxed for 15 min. Then the solution was allowed to cool down to room temperature, and 0.4 mL of acetic acid was added. The reaction mixture was stirred for extra 1 h, and the precipitate was collected by filteration. The crude product was purified by recrystallization from chloroform twice to afford Chromophore **II** as a black powder (0.11 g, 19%). m.p. 200 C (decomp.). 1H-NMR (CDCl3):  0.85 (s), 1.10 (s), 2.09 (s, 2H), 2.41 (s, 2H), 3.74 (t, J = 4.3 Hz, 4H), 3.96 (t, J = 4.3 Hz, 4H), 6.78 (d, J = 9.1 Hz, 2H), 7.02 (d, J = 16.2 Hz, 1H), 7.20 (d, J = 16.0 Hz, 1H), 7.40-7.60 (m, 5H), 7.62 (d, J = 8.8 Hz), 7.79-7.89 (m, 4H), 8.27 (s, 1H). MS (FAB), m/z: 577 [M+1], 100%. Calculated for C35H36N4O4: C, 72.89; H, 6.29; N, 9.72. Found: C, 72.68; H, 6.44; N, 9.81.

Comparison the absorption spectrum of chromophore **II** and **10** in NMP
